# Supplementary material for: MiR-4458-loaded gelatin nanospheres target COL11A1 for DDR2/SRC signaling pathway inactivation to suppress the progression of estrogen receptor-positive breast cancer
Source: Royal Society of Chemistry journal article supplement (doi:10.1039/d2bm00543c), 2022-01-01
Supplement: d2bm00543c1.pdf [file d2bm00543c1.pdf]

## **MiR-4458-loaded gelatin nanospheres target COL11A1 for DDR2/SRC signaling pathway inactivation to suppress progression of estrogen receptor-positive breast cancer**

*Jie Liu<sup>a,#</sup>, Chang-Qing Yang<sup>a,#</sup>, Qiang Chen<sup>b,#</sup>, Tong-Yao Yu<sup>a</sup>, Shi-Long Zhang<sup>a</sup>, Wei-Hong Guo<sup>a</sup>, Li-Heng Luo<sup>a</sup>, Gang Zhao<sup>c,\*</sup>, Da-Chuan Yin<sup>a,\*</sup>, Chen-Yan Zhang<sup>a,\*</sup>*

a, Institute for Special Environmental Biophysics, Key Laboratory for Space Bioscience and Biotechnology, School of Life Sciences, Northwestern Polytechnical University, Xi'an 710072, Shaanxi, PR China

b, State Key Laboratory of Solidification Processing, Northwestern Polytechnical University, Xi'an 710072, Shaanxi, PR China

c, The First Hospital of Jilin University, 130021, Changchun, China

---

The authors declare no conflict of interest.

# These authors contributed equally to this paper.

\* To whom correspondence may be addressed.

Gang Zhao, roger740820@163.com; Da-Chuan Yin, yindc@nwpu.edu.cn, Tel: 86-29-88460254, Fax: 86-29-88460254; Chen-Yan Zhang, zhangchenyan@nwpu.edu.cn, Tel: 86-29-88460543, Fax: 86-29-88460543.

## Supporting Information

| <b>SI Tables</b>  |                                                                                                                                                                       |     |
|-------------------|-----------------------------------------------------------------------------------------------------------------------------------------------------------------------|-----|
| SI 1              | <b>Table S1.</b> Sequences of RNAs.                                                                                                                                   | P1  |
| SI 2              | <b>Table S2.</b> Sequences of primers.                                                                                                                                | P2  |
| <b>SI Figures</b> |                                                                                                                                                                       |     |
| SI 3              | <b>Figure S1.</b> The effect of miR-4458 on MCF-7 cell apoptosis.                                                                                                     | P3  |
| SI 4              | <b>Figure S2.</b> The GESA results of COL11A1.                                                                                                                        | P4  |
| SI 5              | <b>Figure S3.</b> The effect of COL11A1 siRNA on MCF-7 cell apoptosis.                                                                                                | P5  |
| SI 6              | <b>Figure S4.</b> Effect of supernatant of GNs on MCF-7 cell invasion at different time points.                                                                       | P6  |
| SI 7              | <b>Figure S5.</b> HE images of lung, liver and kidney of mice treated with or without GNs.                                                                            | P7  |
| SI 8              | <b>Figure S6.</b> The predicted interaction factor of COL11A1 by Genemania website.                                                                                   | P8  |
| SI 9              | <b>Figure S7.</b> Representative mRNA (A) and protein (B) expression levels of DDR2 in MCF-7 cell after transfection with miR-4458 mimic, inhibitor or COL11A1 siRNA. | P9  |
| SI 10             | <b>Figure S8.</b> Relative cell viability in MCF-7 cultured with different concentration of DDR1IN1 by CCK8.                                                          | P10 |
| SI 11             | <b>Figure S9.</b> Western blot results of DDR2 in MCF-7 cell after transfected with miR-4458 inhibitor and then cultured with 15 $\mu$ M DDR1IN1.                     | P11 |

Table S1. Sequences of RNAs.

| Gene name            | Sequences                                          |
|----------------------|----------------------------------------------------|
| COL11A1 siRNA        | F-GAACGUGGGUCAGCAGGUAUU<br>R-UACCUGCUGACCCACGUUCUU |
| miR-4458 mimic       | F-AGAGGUAGGUGUGGAAGAA<br>R-CUUCCACACCUACCUCUUU     |
| miR-4458 inhibitor   | UUCUUCCACACCUACCUCU                                |
| negative control RNA | F-UUCUCCGAACGUGUCACGUTT<br>R-ACGUGACACGUUCGGAGAATT |

Table S2. Sequences of primers.

| Gene name                    | Sequences                                                      |
|------------------------------|----------------------------------------------------------------|
| COL11A1                      | F-AATGGAGCTGATGGACCACA<br>R-TCCTTTGGGACCGCCTAC                 |
| CDH1                         | F-GCCTCCTGAAAAGAGAGTGGAAG<br>R-TGGCAGTGTCTCTCCAAATCCG          |
| CDH2                         | F-CCTCCAGAGTTTACTGCCATGAC<br>R-GTAGGATCTCCGCCACTGATTC          |
| VIM                          | F-AGGCAAAGCAGGAGTCCACTGA<br>R-ATCTGGCGTTCCAGGGACTCAT           |
| miR-4458 Stem-loop RT primer | GTCGTATCCAGTGCAGGGTCCGAGGTATTTCGCA<br>CTGGATACGACTTCTTC        |
| miR-4458                     | F-CGCGCGAGAGGTAGGTGTG<br>R-CAGTGCAGGGTCCGAGGTAT                |
| GAPDH                        | F-CTGACTTCAACAGCGACACC<br>R-TAGCCAAATTCGTTGTCATACC             |
| DDR2                         | F-CTGTGCACCCCTGGATGAAA<br>R-CCTGGGAGGCATATCAACGG               |
| U6                           | F-CTCGCTTCGGCAGCACA<br>R-AACGCTTCACGAATTTGCGT                  |
| SRC                          | F-TGGCAAGATCACCAGACGG<br>R-GGCACCTTTCGTGGTCTCAC                |
| COL11A1-3'UTR WT             | F-CCGCTCGAGTTCTGATGACTCTAAG<br>R-AGCTTTGTTTAAACAGGAGATGAGATAAC |
| COL11A1-3'UTR mut            | F-TTCAAGGCTATACtcCAAACTTTTT<br>R-AAGAAAAAGTTTggaGTATAGCCTTG    |

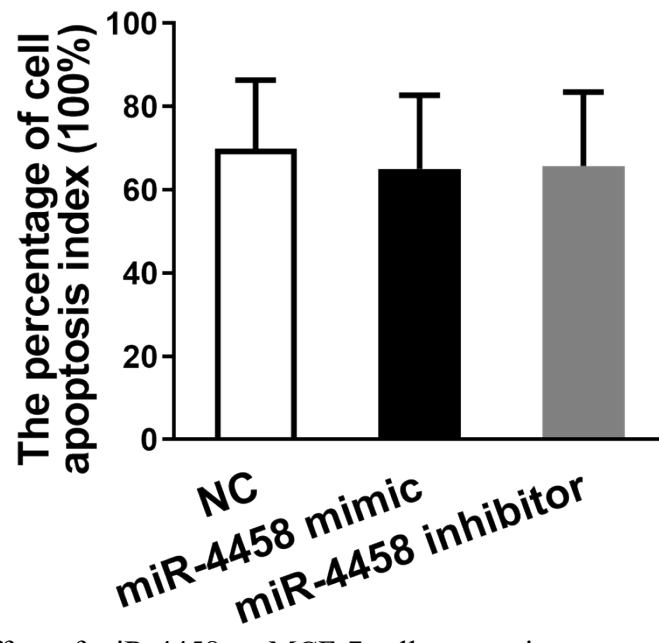

Figure S1. The effect of miR-4458 on MCF-7 cell apoptosis.

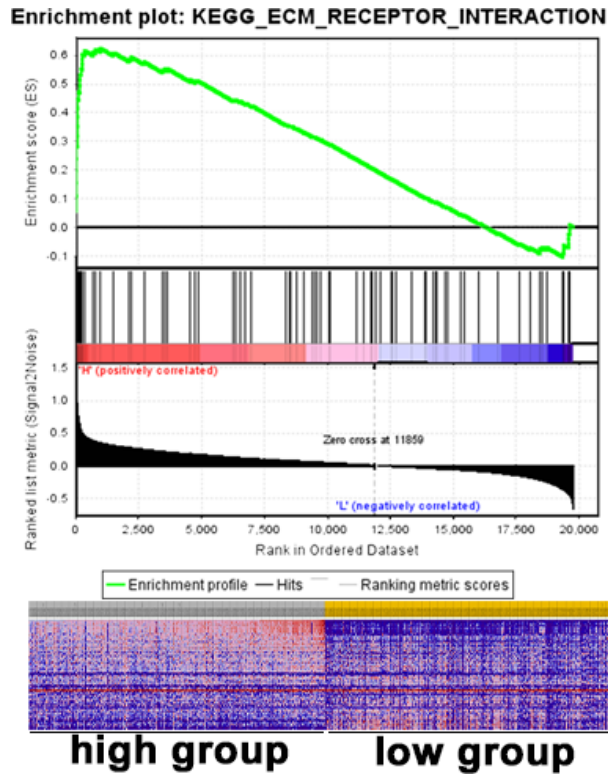

Figure S2. The GESA results of COL11A1.

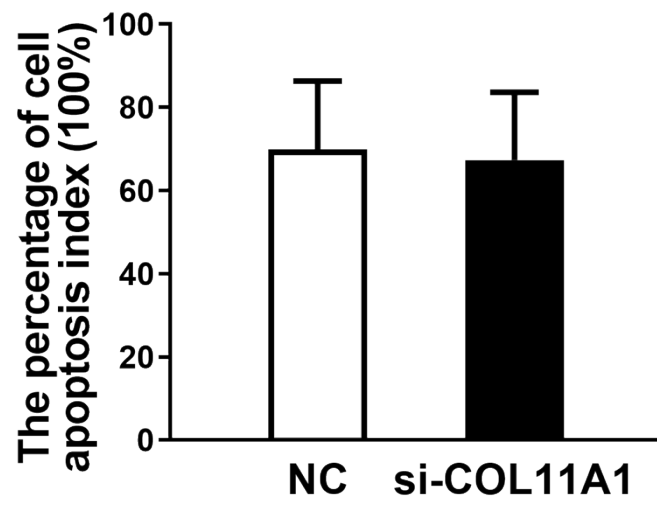

Figure S3. The effect of COL11A1 siRNA on MCF-7 cell apoptosis.

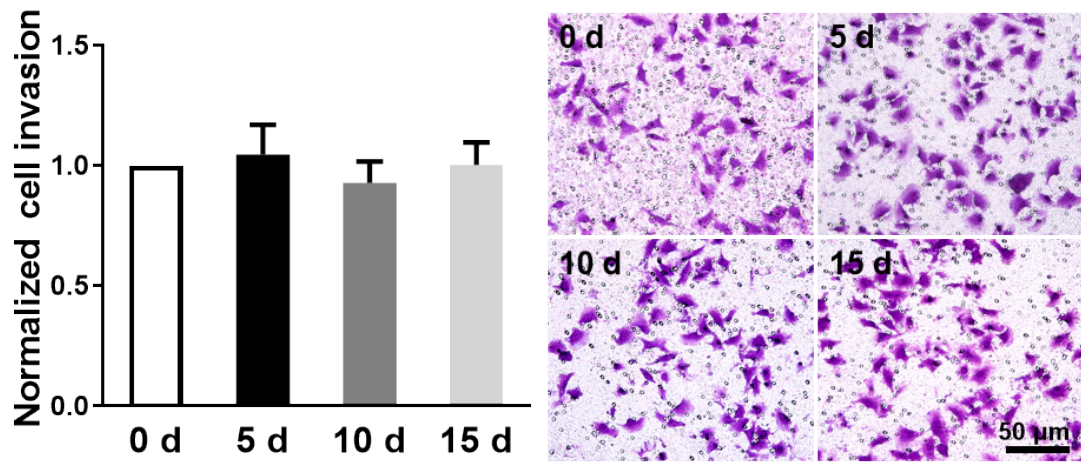

Figure S4. Effect of supernatant of GNs on MCF-7 cell invasion at different time points.



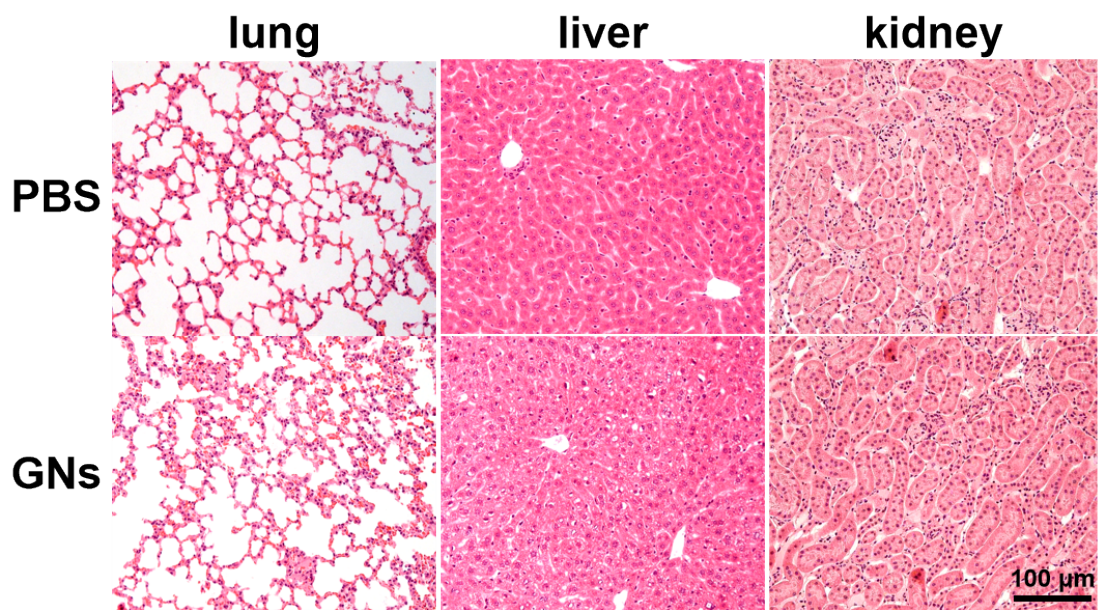

Figure S5. HE images of lung, liver and kidney of mice treated with or without GNs.

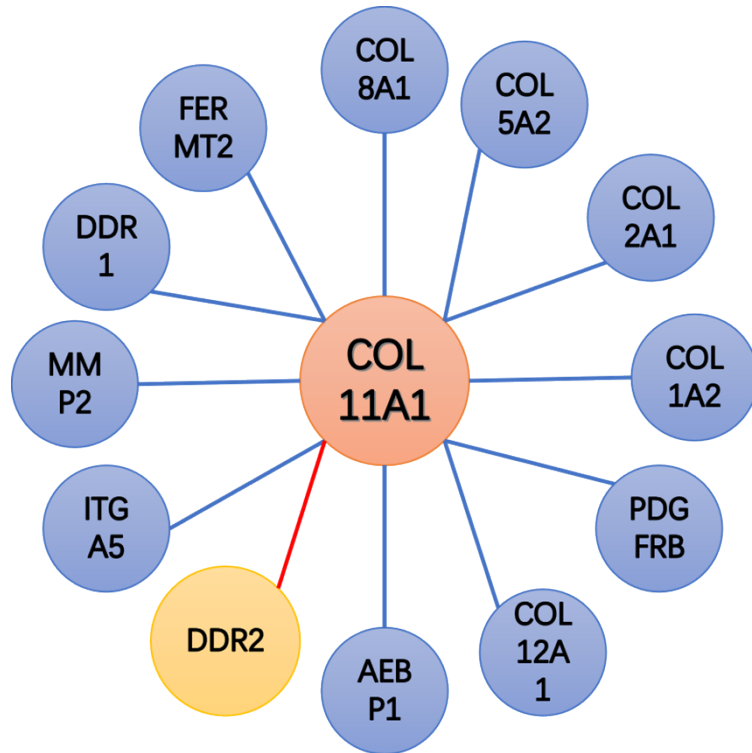

Figure S6. The predicted interacted genes of COL11A1 by Genemania website.

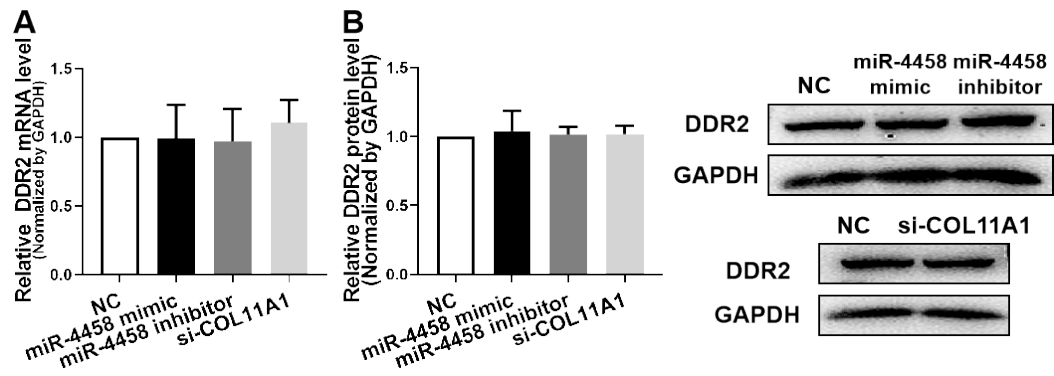

Figure S7. Relative mRNA (A) and protein (B) levels of DDR2 in MCF-7 cell after transfection with miR-4458 mimic, inhibitor or COL11A1 siRNA.

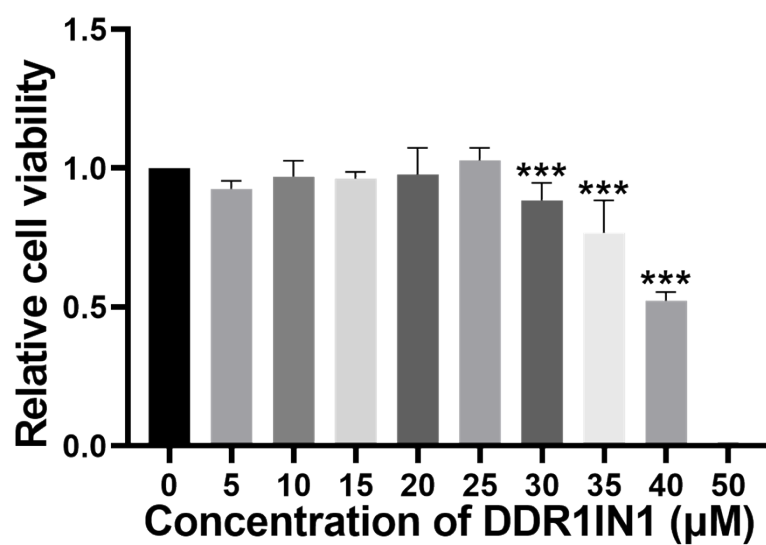

Figure S8. Relative cell viability in MCF-7 cells treated with different concentration of DDR1IN1. Data are shown as the mean  $\pm$  SD. One-way ANOVA were used for statistical analysis followed by post-hoc tests.  $p < 0.001$  indicated by \*\*\*.

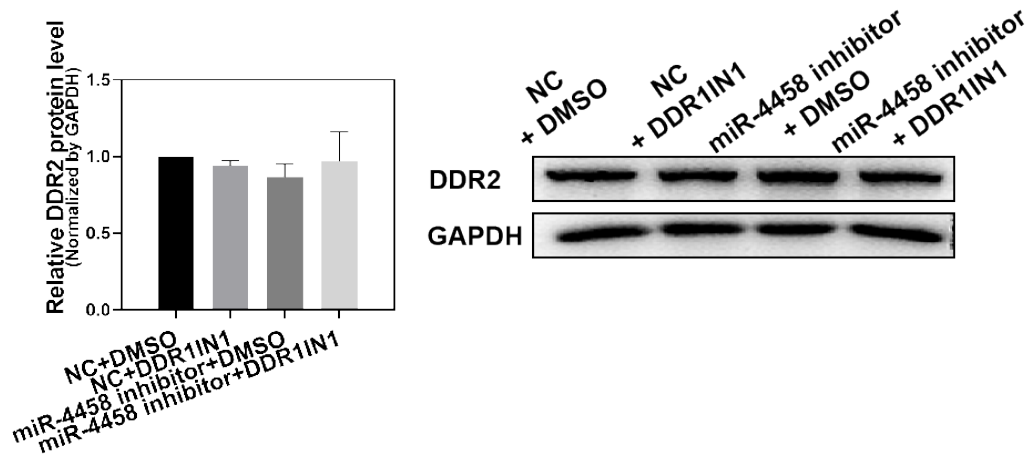

Figure S9. Western blot results of DDR2 in MCF-7 cell after treated with miR-4458 inhibitor and then cultured with 15  $\mu$ M DDR1IN1.
